1           **Comprehensive Comparative Genomics Reveals Over 50 Phyla of Free-living and**  
2           **Pathogenic Bacteria are Associated with Diverse Members of the Amoebozoa**

3  
4  
5  
6  
7   Yonas I. Tekle<sup>\*</sup>, Janae M. Lyttle, Maya G. Blasingame

8   <sup>1</sup> Dept. of Biology, Spelman College, Atlanta, Georgia, USA

9  
10   \*Corresponding Author: Yonas I. Tekle, Spelman College, 350 Spelman Lane Southwest,  
11   Atlanta, GA 30314---Telephone number: 404-270-5779; e-mail: ytekle@spelman.edu

1 **Abstract**

2 The association of bacteria with microbial eukaryotes has been extensively studied. Among these  
3 the supergroup Amoebozoa containing predominantly amoeboid unicellular protists has been  
4 shown to play an important ecological role in controlling environmental bacteria. Amoebozoans  
5 not only graze bacteria but also serve as a safe niche for bacterial replication and harbor  
6 endosymbiotic bacteria including dangerous human pathogens. Despite their importance, only a  
7 few lineages of Amoebozoa have been studied in this regard. Amoebozoa encompasses lineages  
8 of extreme diversity in ecology, morphology and evolutionary history. The limited amoebozoans  
9 studied are not representative of the high diversity known in the supergroup, and could  
10 undermine our understanding of their role as key players in environmental ecosystems and as  
11 emerging public health threats. In this research, we conducted a comprehensive genomic and  
12 transcriptomic study with expansive taxon sampling by including representatives from the three  
13 known clades of the Amoebozoa. We used culture independent whole culture and single cell  
14 genomics maintained in our laboratory cultures, and additionally published RNA-Seq data to  
15 investigate the association of bacteria with diverse amoebozoans. Relative to current published  
16 evidence, we recovered the largest number of bacterial phyla (57) and pathogen genera (49)  
17 associated with the Amoebozoa. Using single cell genomics we were able to determine up to 24  
18 potential endobiotic bacterial phyla, some potentially endosymbionts. This includes the majority  
19 of multidrug-resistant pathogens designated as major public health threats. Our study  
20 demonstrates amoebozoans are associated with many more phylogenetically diverse bacterial  
21 phyla than previously recognized. It also shows that all amoebozoans are capable of harboring  
22 far more dangerous human pathogens than presently documented, making them of primal public  
23 health concern.

24

25 **Key words:** Pathogen, symbiosis, genome, transcriptome, Bacteria, Amoebozoa

## 1 **Introduction**

2 The study of microbial interactions is a complex and fascinating field of research <sup>1-3</sup>.  
3 Microorganisms occupy diverse ecological niches and are usually found in large communities  
4 that result in inherent interactions. Coevolutionary processes have been shaping these  
5 interactions, which gave rise to various types of adaptation, specialization and establishment of  
6 temporary and stable (obligate) associations <sup>2,4-6</sup>. Understanding microbial interactions have  
7 profound evolutionary implications; among other notable insights, it has contributed to our  
8 understanding of the origin of eukaryotic cells <sup>7</sup>, ecosystem health and function <sup>8</sup> as well as  
9 disease and pathogen evolution <sup>9-11</sup>. While the biodiversity of microbes is generally poorly  
10 understood, many examples of well-established associations are known among various microbes  
11 <sup>12</sup>. Among these, the interactions of bacteria with protists (single-cell eukaryotes) have been a  
12 subject of immense scientific interest and substantial investigations <sup>9-11,13</sup>. Protists comprise some  
13 of the most important primary grazers of environmental bacteria. They play an integral role in  
14 major biogeochemical and ecological processes of microbial food webs, substantially  
15 contributing to nutrient recycling and energy transfer to higher trophic levels both in aquatic and  
16 terrestrial ecosystems <sup>2,14</sup>. Furthermore, many animal and human pathogenic bacteria are directly  
17 or indirectly associated with protists. Several studies have shown that many bacteria, including  
18 some that are well-known multidrug resistant (e.g. *Legionella*), are capable of evading digestion  
19 by protists <sup>3,15-17</sup>. These bacteria use protist hosts as safe haven to reproduce and as intermediate  
20 agents to infect their final hosts. Many examples of this type of relationship are known in ciliates  
21 <sup>13</sup>, flagellates <sup>18</sup> and amoeboids <sup>3,9,14</sup>. In this study, we will focus on the association of bacteria  
22 with the predominantly amoeboid supergroup, Amoebozoa.

23  
24 The association of bacteria with Amoebozoa has been mostly studied from two representatives,  
25 *Acanthamoeba* and *Dictyosletlium* <sup>19-23</sup>. These two amoebozoans are extensively studied as  
26 models in many important cellular processes and pathogenesis <sup>10,20,24-27</sup>. Some reports on  
27 association with bacteria are also available in a few other amoebozoan genera (e.g. *Vermamoeba*,  
28 *Platyamoeba/Vannella*) <sup>17,20,28-30</sup>. These studies demonstrated that amoebozoans are both grazers  
29 and hosts of some bacterial epibionts (attached to the surface of the amoebozoan) and endobionts  
30 (within the cytoplasm of the amoebozoan), the latter including dangerous human pathogens.  
31 Amoebozoans have been implicated as training ground for emerging pathogens and vehicles for

1 their dispersal<sup>4,20</sup>. These studies also gave insights on mechanism of pathogen evasion and host  
2 defense<sup>16,20,26,31</sup>. Despite these major advances in the field, the number of amoebozoans  
3 examined for association with bacteria remain limited; and the studied lineages are not  
4 representative of the extremely diverse groups currently recognized within the supergroup.  
5 Amoebozoa encompasses members characterized by diverse morphology, ecology, behavior and  
6 life cycle<sup>32-35</sup>. The limited taxa used to study association with bacteria, undoubtedly has missed  
7 the vast diversity of bacteria that could potentially be associated with the Amoebozoa.  
8 Consequently, this under sampling hampers our knowledge of the positive contributions, and  
9 impact, that amoebozoans might have on the environment; and their role in major public health  
10 concerns.

11  
12 Over ten bacterial pathogens (in humans and other eukaryotes) belonging to the commonly  
13 discovered five bacterial phyla (Proteobacteria, Bacteroidetes, Chlamydiae, Firmicutes and  
14 Actinobacteria) have been reported in the Amoebozoa<sup>4,9,17,20,24,28,29</sup>. Additionally, some less  
15 known bacteria phyla (e.g. Dependotia), and unclassified or novel bacterial lineages, have been  
16 reported to form temporary or stable endosymbiotic associations with some amoebozoans<sup>6,36</sup>.  
17 These reports are mostly based on culture-dependent studies, which focus on the microbiome of  
18 bacteria that can be cultured concurrently with the target amoebozoan. Culture-dependent studies  
19 fail to capture those bacteria that are unculturable under conventional laboratory conditions and  
20 with established culture media. Studies that used a culture-independent approach also suffer from  
21 taxon sampling, or they are limited to specialized or specific environments<sup>29,37</sup>. In order to  
22 capture the complete microbiome of the Amoebozoa-associated bacteria, we used a culture-  
23 independent, comprehensive genomic approach and surveyed 49 samples (38 species) covering  
24 most known lineages of Amoebozoa. The samples come from the three major clades of  
25 Amoebozoa, consisting of lineages of different morphology, ecology and behavior<sup>32</sup>. We used  
26 large genetic sampling, including genome data derived from whole culture and single cells  
27 maintained in our laboratory and transcriptome data obtained from prior published research. We  
28 assessed the impact of sampling and culturing conditions on the types and number of bacteria  
29 discovered. Our study reveals 57 bacterial phyla, including 49 known human pathogenic genera,  
30 associated with the various members of the Amoebozoa. Our study reports the largest number of  
31 associated bacteria, including new phyla and pathogen genera, not reported in previous studies.

1 Our findings reinforce previous reports that showed Amoebozoa as a major grazer of  
2 environmental bacteria, and host of many bacterial endosymbionts, some that pose a threat to  
3 public health. This study also lays foundation for further investigations on mechanisms of  
4 predator-prey relationships, evasion of host defense (immunity) and forms and types of  
5 associations of newly discovered epi- and endobionts, some that are symbiotic and others that are  
6 internalized pathogenic bacteria.

7

8

## 9 **Results**

10

### 11 **Overall Composition of Amoebozoa Associated Bacteria**

12 Taxonomic assignment of the various genetic datasets analyzed, combining genome data  
13 generated in this study with transcriptomes from previous studies, yielded a large number of  
14 amoebozoan-associated bacteria phyla with overall similar taxonomic compositions across the  
15 three clades of Amoebozoa. A total of 57 bacterial phyla were discovered from all of the datasets  
16 examined (Fig. 1, Tables S1-S3). Since the majority of bacterial phyla, 56, were found in the  
17 whole culture RNA-Seq dataset, we will focus our comparison among the clades of Amoebozoa  
18 based on this dataset mostly (Fig. 2). One additional phylum besides others was found in the  
19 whole culture genome dataset (Table S3). Discosea, with the highest number of taxa analyzed in  
20 whole culture RNA-seq dataset, contained 52 bacterial phyla, while Evosea and Tubulinea had  
21 44 and 39 phyla, respectively (Fig. 1, Table S1). Among these discovered phyla, 33 phyla are  
22 shared among the three clades (Fig. 2A). While the bacterial taxon sampling for Tubulinea in the  
23 transcriptome data is smaller than Evosea and Discosea, the latter two clades shared more  
24 bacterial phyla between them (i.e. 9), when compared to the phyla that they each mutually shared  
25 with Tubulinea (i.e. 1 and 3, respectively) as shown in Fig. 2A. We also found some bacterial  
26 phyla specifically associated with each clade; namely, 7 in Discosea, 2 in Tubulinea and 1 in  
27 Evosea (Fig. 2A). However in future research, the specific bacterial phyla recovered in each  
28 clade might change with more taxon sampling, and in relation to the nature of the acquired data.  
29 For instance, two samples from the same species, *C. minus*, in the whole culture genome data  
30 showed variation in the number of bacterial phyla recovered and shared (Table S3). This

1 indicates that a thorough and even sampling is required to make such comparisons. Overall,  
2 phyla recovered were proportional to data size and taxon sampling (Fig. 1, Tables S1-S3).

3  
4 The total number of genera and their representation differed by bacterial phyla in our datasets.  
5 The most abundant bacterial phylum recovered in all datasets and amoebozoan clades is  
6 Proteobacteria (Tables 1, Tables S1-S3). Class Gammaproteobacteria, a subdivision of  
7 Proteobacteria, was represented by a higher number of genera and total number of sequences that  
8 were representative for its genera (Tables 1, S1-S5). Other bacterial phyla were represented by  
9 over 1000 sequences for the genera recovered, including Bacteroidetes and Firmicutes (Table 1).  
10 Generally, a higher number of sequences representing a given phylum were observed in the  
11 whole culture genome data (Table S3).

12

### 13 **Comparison of Data types and Potential Endosymbiont Bacterial Phyla**

14 The four data types analyzed yielded bacterial phyla that are commonly shared among samples  
15 and amoebozoan clades analyzed (Figs. 2, S1, Tables S1-S5). We observed some variations in  
16 taxonomic breadth and the total number genera recovered depending on data type and taxon  
17 sampling size (Figs. 2, S1, Tables S1-S5). As mentioned above all except one bacterial phylum  
18 reported here were present in whole culture RNA-Seq datasets (Table S1). While the large  
19 number of bacterial phyla in the whole culture RNA-Seq dataset can be partly attributed to the  
20 size of taxon sampling used for this dataset, these results clearly indicates that RNA-Seq is a  
21 good data source for this type of study. The whole culture genome data is represented by two  
22 independent samples from a single species, *C. minus* (Table S3). A total of 36 bacterial phyla  
23 were recovered from these samples, 35 of these are shared with the whole culture RNA-Seq  
24 dataset (Fig. 2B). The single cell genome data yielded the lowest number, 19 bacterial phyla  
25 (Table S3), after the single cell RNA-Seq data (24 phyla) (Tables S2). Using the four datasets we  
26 were able to identify 14 potential endobionts/epibionts by taking a subset of the bacterial phyla  
27 discovered in each dataset (Fig. 2B). Use of single cells datasets, both genome and RNA-Seq,  
28 primarily aimed at reducing bacteria contamination from external environment enabled us to  
29 deduce these 14 putative endobionts/epibionts. A total of 24 potential endobionts/epibionts phyla  
30 can be recognized if we considered taxa shared among three datasets i.e. all the phyla discovered  
31 in single cell RNA-Seq dataset (Fig. 2B, Table 1). Among these seven putative endobionts phyla

1 (5 shared in all and 2 shared among 3 datasets, Table 1) included members (human pathogen  
2 genera) previously reported to associate with or found in the cytoplasm of amoebozoan hosts  
3 3,9,22,24,31,46

4  
5 In order to assess the impact of culturing techniques and types of bacteria that may be associated  
6 due to difference in the environment of isolation and types of food sources used between labs,  
7 we compared RNA-Seq data of three taxa sequenced in two different labs. Our comparison  
8 showed similar total number of bacterial phyla recovery but with some differences in the number  
9 of overlapping phyla (Table S1). The variation of non-overlapping phyla in these three pairs of  
10 species ranged from 5-7. This observed difference using the RNA-Seq data is smaller compared  
11 to the variation observed in the number of non-overlapping phyla found in the genome data  
12 samples (Table S3). The whole culture genome data used two samples from the same species that  
13 were cultured under the same conditions. These two samples had 9 non-overlapping bacterial  
14 phyla, which indicate that other technical factors, such as sample quality and sequencing, might  
15 affect the recovery rate of overlapping bacterial community in samples of the same species.

### 16 17 **Human pathogenic Bacterial phyla and genera associated with Amoebozoa**

18 Our survey of literature for bacterial human pathogens yielded over 60 genera spanning 10 phyla  
19 (Table S4). We used this list to investigate the presence of pathogenic genera in our datasets  
20 (Tables S4-S5). Of the 67 bacterial human pathogenic genera surveyed, 49 pathogens were found  
21 belonging to 9 different phyla (Figs. 3, S1, Table 1, Tables S4, S5). The number of pathogens  
22 recovered in the three clades, Discosea (39 pathogens), Evosea (35 pathogens) and Tubulinea (33  
23 pathogens), were similar despite taxon sampling differences in the whole culture RNA-Seq  
24 dataset (Fig. 3, Table S4). We also recovered a similar set of pathogens among the four datasets  
25 (whole culture and single cell genome and transcriptome datasets, 30-44 pathogens); except, the  
26 single cell genome dataset had a lower (11) number of pathogens (Fig. S1, Tables S4, S5). These  
27 eleven pathogens discovered in our single cell genome dataset belonged to bacterial phyla that  
28 were shown to be putative endosymbionts (see above, Fig. 2B, Tables 1, S5).

29  
30 The top three phyla with the highest number of pathogenic bacterial genera recovered include  
31 Proteobacteria, Actinobacteria and Firmicutes (Table 1). Among the classes of Proteobacteria,

1 Gammaproteobacteria had the largest number (15 pathogen genera) compared to any group  
2 analyzed (Table 1). Of the nine pathogen containing phyla five were found in at least 3 datasets,  
3 while two including Chlamydiae (*Neochlamydia*) and Fusobacteria (*Fusobacterium*), were rare  
4 and only recovered in one dataset (Table 1, Fig. S1).

## 6 **Discussion**

### 8 **Large Amoebozoa Associated Bacterial Phyla Recovered**

9 Our study using whole culture and single cell genomics and transcriptomics recovered the largest  
10 number of bacterial phyla that are potentially associated with the supergroup Amoebozoa to date.  
11 The majority of the bacterial phyla recovered in our analysis of the amoebozoans are newly  
12 reported here for the first time (Fig. 1, Tables S1-S3). We also found well known and common  
13 amoebozoan-associated bacterial phyla reported in previous studies<sup>3,4,6,9,15,24,28-30,37</sup>. The large  
14 and taxonomically diverse discovery of amoebozoans associated bacterial phyla in this study  
15 could be attributed to the comprehensive taxon sampling and molecular genetic approach  
16 employed. We analyzed amoebozoans characterized by diverse ecology, behavior and  
17 evolutionary history that represented the three major clades of the Amoebozoa. We used  
18 monoclonal cultures of amoebozoans isolated directly from nature or acquired from culture  
19 collection agents<sup>32,33,35</sup>. Research methods using monoclonal cultures typically include addition  
20 of food bacteria (e.g., *E. coli* or *Klebsiella*); but once the culture starts to advance, it is common  
21 to see more bacterial communities, besides food bacteria, growing among the amoebozoan cells.  
22 Amoebozoans are known to carry undigested food bacteria vertically through generations. These  
23 food bacteria are used presumably as seeds to be conserved for potential replenishment within  
24 new environments encountered by the amoebozoan, and then harvested as food; this behavior led  
25 some to metaphorically call amoebozoans, ‘farmers’<sup>20,47-49</sup>. Therefore, the bacteria found in  
26 monoclonal samples analyzed likely reflect a bacterial community that might be expected to  
27 occur naturally in nature; although we cannot rule out that some are acquired from contamination  
28 during laboratory culture as for example from contact with instruments used in culturing or from  
29 air-borne bacteria introduced from the laboratory environment. The taxonomic composition of  
30 bacteria found in amoebozoans grown in different labs, or obtained from different culture  
31 collection agents, in the RNA-Seq data were similar (Table S1). The consistent recovery of



1 similar bacterial phyla across different amoebozoan samples and taxonomic groups, that we have  
2 found in our analyses for this research study, also indicates that all bacterial lineages discovered  
3 in our analysis are potentially associated with the Amoebozoa, and may mitigate against possible  
4 contamination from sources largely derived from the laboratory environment. While the  
5 confirmation and type of association of the newly discovered bacteria awaits further  
6 investigation, our study reinforces amoebozoans as key players in controlling environmental  
7 bacteria through grazing. Our study also shows that Amoebozoa harbor more taxonomically  
8 diverse bacteria, with 64% of the 89 bacterial phyla in SILVA database recovered, than  
9 previously reported.

10

11 The large taxonomic sampling of amoebozoans in our study was made possible by the use of  
12 transcriptome data. In recent phylogenomic studies, a large number of RNA-Seq datasets have  
13 been generated in the Amoebozoa<sup>32,33,35</sup>. These transcriptome data are generated using a  
14 standard approach that selects polyadenylated RNA (polyA) in RNA samples, which selects  
15 against bacterial contaminant transcripts that are typically poorly polyadenylated<sup>50,51</sup>. However,  
16 transcriptome data collected from amoebozoans using this approach typically contains large  
17 bacterial transcripts and some ribosomal genes<sup>32,33,35</sup>. While contamination by bacteria in  
18 transcriptome data has been reported in axenic culture, or in species that do not normally feed or  
19 associate with bacteria (likely contamination from environment)<sup>52</sup>, the close association of  
20 bacteria (food and endosymbiont) with amoebozoans exacerbates the potential for contamination  
21 of transcriptomes even more. We took advantage of this, and used the 16S bacterial ribosomal  
22 genes found in amoebozoan RNA-Seq data to assess bacterial association with the Amoebozoa.  
23 Despite the potential limitation that transcriptome data might have for our study, the aggregate  
24 number of bacterial phyla recovered from transcriptome sequencing was comparable in  
25 taxonomic coverage to the whole culture genome data (Fig. 2). As expected, the number of  
26 genomic representations of the discovered phyla in the whole culture genome data was higher  
27 than the transcriptome data (Table S1-S3), which indicates that transcriptome data might to an  
28 extent underrepresent the actual abundance of associated bacterial populations. Our results  
29 support the utility of transcriptome data to study association of bacteria with amoebozoans or  
30 other similar protists. Though a conservative estimate, transcriptome data has some advantages  
31 over genome data due to lower cost and ease in acquiring it. Moreover, transcriptome data can

1 provide additional information on the nature of an association by providing physiological data  
2 (profile of expressed genes) among interacting species <sup>53</sup>.

3  
4 In addition to the rich sources of transcriptome data as discussed above, the use of whole culture  
5 and single cell genomics, as used in our laboratory culture studies reported here, enabled us to  
6 assess potential bacterial endobionts (possibly including epibionts) associated with the  
7 Amoebozoa. Using this approach we identified 14-24 potential endobionts/epibionts bacterial  
8 phyla (Fig. 2B, Table 1). Our list includes bacteria phyla whose members were previously shown  
9 to form true endosymbiotic relationship in some amoebozoans <sup>6,9,28,54,55</sup>. However, a more  
10 thorough approach including single cell genome and cytological data, such as use of  
11 fluorescently labeled oligonucleotide probes (e.g., Horn et al., 2000), is needed to establish true  
12 endosymbiotic relationships with Amoebozoa. Nonetheless, the recovery of known  
13 endosymbiotic bacteria in our analysis gives credence to the reliability of our approach to  
14 identify potential endosymbiotic bacteria candidates that can be studied further. It should be  
15 noted that some amoebozoans are selective bacterial predators <sup>56-58</sup>. The combination of single  
16 cell genomics and transcriptomics approaches used here is a promising method of analyzing  
17 selective feeding on bacteria by protists; e.g., a recent study demonstrated the utility of  
18 transcriptome data for selective feeding in a ciliate lineage <sup>53</sup>.

19

## 20 **Pathogenic bacteria associated with the Amoebozoa**

21 The association of pathogenic bacteria with some members of Amoebozoa has been investigated  
22 in great detail <sup>3,4,20,21,26,59</sup>. Most of the association of pathogenic bacteria described with  
23 amoebozoans is facultative, but some permanent associations are also known <sup>6,28,46</sup>. While most  
24 associations are transient and harmless, some bacterial infections (e.g. *Legionella*), leading to  
25 lysis of amoebozoan cells, have been reported <sup>4,60</sup>. In facultative associations, the pathogenic  
26 bacteria can use the amoeba cell as a safe niche to reproduce, or intermediate host, or even as a  
27 vehicle for dispersal or population reservoir <sup>4,21</sup>. Some recent studies have proposed that  
28 amoebozoans could serve as an ‘interim training ground’ to develop intracellular survival  
29 strategies before becoming a human pathogen due to the similarity in mechanism of  
30 phagocytosis (phagolysosome) within mammalian macrophages <sup>4,16,27</sup>. Most of the known  
31 pathogenic bacteria associated with Amoebozoa so far come from the studies that used only a

1 few amoebozoan species, which are not necessarily reflective of pathogens that can be harbored  
2 by various groups in the supergroup of Amoebozoa. In this study, we discovered 49 pathogenic  
3 bacterial genera belonging to 9 phyla, the highest report so far (Table 1). The number and  
4 distribution of pathogenic genera across the three major groups of Amoebozoa were comparable  
5 despite differences in taxon sampling among them (Figs. 3, S1). Our list includes previously  
6 reported common pathogen bacterial phyla<sup>20,59</sup> in addition to the large number of pathogens  
7 newly discovered in this study (Tables 1, S4). Congruent with previous studies, the most  
8 dominant pathogen-containing phylum is Proteobacteria. One of its subdivisions, class  
9 Gammaproteobacteria, comprised more than 50% of the pathogenic genera identified in this  
10 study (Table 1). Interestingly one of the bacterial pathogen phylum, Chlamydiae, frequently  
11 recovered in previous studies<sup>28,46,61</sup> was very rare and only found in one of our data sets. Several  
12 of the pathogenic bacteria found associated with amoebozoans are studied from anthropogenic  
13 habitats (e.g. cooling towers, hospitals, humidifier aerosols, drinking water, spas or swimming  
14 pools)<sup>23,29,30,37,54</sup>. The representation of some pathogen-containing phyla might be affected by  
15 habitat examined. Nevertheless, our results demonstrate that all amoebae are potential carriers of  
16 bacterial pathogens both in nature or anthropogenic environments. All of the multidrug resistant  
17 genera (except *Helicobacter*) found in this study are listed and categorized by CDC and WHO as  
18 urgent, and various levels of threats and concerns. Among these are *Acinetobacter*, *Clostridium*,  
19 *Enterococci*, *Neisseria*, *Campylobacter*, *Pseudomonas*, *Salmonella*, *Mycoplasma*, *Streptococcus*,  
20 *Bordetella* that were found in the amoebozoans we examined (see Table 1). This makes some  
21 Amoebozoa that are associated with potential or acknowledged human pathogens a major public  
22 health threat.

23

## 24 **Materials and Methods**

25

### 26 **Whole Culture and Single Cell Genomics**

27 We used various approaches to investigate bacteria associated with amoebozoans. Association of  
28 bacteria with their host can be internal endobionts (some endosymbionts) or external those that  
29 are epibionts attached to the surface of the cell and those that are freely present in cultures that  
30 are potentially available to be engulfed as a food source. In order to capture all associated  
31 bacteria in diverse monoclonal cultures of amoebozoans in our laboratory, we used molecular

1 data collected using two approaches. The first set of genetic data collected consisted of  
2 community genomic DNA extracted from actively growing cultures of amoebozoans; and from  
3 the bacterial community typically found in monoclonal or newly isolated species maintained in  
4 our laboratory cultures. The second genetic data is derived from single amoebozoan cells,  
5 individually picked out of our laboratory cultures. The main difference between these two  
6 approaches is that the first approach, *whole culture*, is aimed at collecting large quantities of  
7 DNA from a monoclonal population without little consideration to bacteria contamination from  
8 the culture; while the second approach, *single cell*, is aimed at minimizing bacterial  
9 contamination from the surrounding environment.

10

11 In the single cell approach, amoebozoan cells including *Cochliopodium minus*, *Stratorugosa*  
12 *tubuloviscum*, *Trichosphaerium* sp. and *Amoeba proteus* were individually picked using mouth  
13 pipetting techniques and transferred to a clean glass slide to wash off bacteria (other microbial  
14 eukaryotes (food or prey) in *A. proteus* culture) to reduce contamination of freely growing  
15 bacteria (other contaminants) from the culture. This step does not necessarily remove epibionts  
16 that are tightly bound to the cell surface but it greatly minimizes free (loosely bound) bacteria  
17 growing in culture. *Stratorugosa tubuloviscum* and *C. minus* were grown in plastic Petri dishes  
18 with bottled natural spring fresh water (Deer Park®, Nestlé Corp. Glendale, CA, USA) with  
19 added autoclaved grains of rice as an organic nutrient source to support bacterial growth as prey  
20 for the amoebozoans. The marine *Trichosphaerium* sp. was grown under a similar condition as  
21 above in artificial seawater. *Amoeba proteus* was purchased from Ward's Science culture  
22 collection (wardsci.com) and was cultured with mixed bacteria and other microbial eukaryote  
23 food sources. Cleaned individual cells (5-10) were transferred into 0.2-mL PCR tubes and  
24 genome amplified using REPLI-g Advanced DNA Single Cell Kit (Qiagen Hilden, Germany).  
25 For the whole culture approach, genomic DNA was extracted from a large number of  
26 *Cochliopodium minus* (syn. *C. pentatrifurcatum*<sup>38,39</sup> cells in culture dishes (50 Petri dish cultures)  
27 using MagAttract high-molecular-weight (HMW) DNA kit (Qiagen, MD), following the  
28 manufacturer's instructions. This method includes gentle cell lysis, releasing high molecular  
29 weight DNA and its efficient isolation and purification by concentration on DNA-binding,  
30 surface coated magnetic beads. Genome sequencing was performed using 10X genomics (for  
31 whole culture DNA) and Oxford Nanopore (ONP) (for both single cells and whole culture DNA)

1 following the manufacturers' protocol. Genome data from 10X genomics and ONP were  
2 assembled using Supernova v2.1.1<sup>40</sup> and Minimap2-Miniasm-Racon genome assembly pipeline  
3<sup>41-43</sup>, respectively. For ONP genome data we used Filtrlong version 0.2.0  
4 (<https://github.com/rrwick/Filtrlong>) to filter reads with length shorter than 200 and quality score  
5 less than 5. Porechop version 0.2.4 (<https://github.com/rrwick/Porechop>) was used to remove  
6 ONP sequencing adapters added during the sequencing.

## 7

### 8 **Whole Culture and Single Cell Transcriptome Data**

9 Based on preliminary analysis that showed amoebozoan transcriptomes contained large bacterial  
10 transcripts and some ribosomal genes, we analyzed RNA-Seq from previous publications  
11 collected in a similar manner as above<sup>32,33,35,44</sup>. The whole culture RNA-Seq dataset included a  
12 total of 35 species (15 discoseans, 12 evoseans, and 8 tubulinids) with three additional duplicate  
13 samples from Discosea sequenced in two different labs<sup>32,33,35</sup>. These discosean duplicate  
14 samples were included in the analysis to examine the effects of culturing methods and  
15 environment on the number and composition bacterial community recovered. The single cell  
16 RNA-Seq dataset was represented by 5 samples obtained from *Cochliopodium minus*<sup>44</sup>. Data  
17 collection, sequencing and assembly of transcriptome data of these diverse amoebozoans,  
18 representing the three main clades of Amoebozoa (Discosea, Evosea, and Tubulinea) of the  
19 whole culture and single cell RNA-Seq datasets, are described in Kang et al.<sup>32</sup> and Tekle et al.  
20<sup>33,35</sup>, and Tekle et al.<sup>44</sup>, respectively. Some good quality transcriptomes whose origin was not  
21 certain or is collected using a combination of single cell and whole culture are placed in the  
22 whole culture RNA-Seq dataset. All transcriptomes used for single cell RNA-Seq dataset are  
23 collected in our laboratory under similar experimental conditions<sup>44</sup>.

24

### 25 **Taxonomic Assignment of Amoebozoa Associated Bacterial Sequence Data**

26 Taxonomic assignment of the assembled contigs (>300 pbs) from genome and transcriptome data  
27 was performed with Kraken 2<sup>45</sup>. This program's sequence algorithm classifies sequences by  
28 mapping k-mer to the lowest common ancestor (LCA) of all the datasets containing the given k-  
29 mer in the specified database. The 16S database, SILVA, was chosen for this analysis and  
30 taxonomic classification was done to a genus level. Kraken 2 was run with default settings  
31 locally in an interactive session on XSEDE server, a supercomputing platform (<http://xsede.org>).

1 To obtain broad evidence of amoebozoan-associated bacteria, we analyzed a total of 49 samples  
2 (genome and transcriptome data) of amoebozoans, representing 38 species belonging to the three  
3 major clades of Amoebozoa. Similarly, we compared taxonomic composition results of genome  
4 and RNA-Seq data obtained using the whole culture and single approaches. Resulting data were  
5 further analyzed using R and Excel.

6

## 7 **Acknowledgments**

8 This work is supported by the National Science Foundation EiR (1831958) and National  
9 Institutes of Health (1R15GM116103-02) to YIT. We would like to thank Fang Wang for  
10 technical assistance during data collection and analysis. O. Roger Anderson is thanked for his  
11 invaluable comments and edits on the manuscript.

12

## 13 **Reference**

14

- 15 1 Gast, R. J., Sanders, R. W. & Caron, D. A. Ecological strategies of protists and their  
16 symbiotic relationships with prokaryotic microbes. *Trends Microbiol* **17**, 563-569,  
17 doi:10.1016/j.tim.2009.09.001 (2009).
- 18 2 Braga, R. M., Dourado, M. N. & Araujo, W. L. Microbial interactions: ecology in a  
19 molecular perspective. *Braz J Microbiol* **47 Suppl 1**, 86-98,  
20 doi:10.1016/j.bjm.2016.10.005 (2016).
- 21 3 Barker, J. & Brown, M. R. Trojan horses of the microbial world: protozoa and the  
22 survival of bacterial pathogens in the environment. *Microbiology* **140 ( Pt 6)**, 1253-1259,  
23 doi:10.1099/00221287-140-6-1253 (1994).
- 24 4 Molmeret, M., Horn, M., Wagner, M., Santic, M. & Abu Kwaik, Y. Amoebae as training  
25 grounds for intracellular bacterial pathogens. *Appl Environ Microbiol* **71**, 20-28,  
26 doi:10.1128/AEM.71.1.20-28.2005 (2005).
- 27 5 Hibbing, M. E., Fuqua, C., Parsek, M. R. & Peterson, S. B. Bacterial competition:  
28 surviving and thriving in the microbial jungle. *Nat Rev Microbiol* **8**, 15-25,  
29 doi:10.1038/nrmicro2259 (2010).
- 30 6 Horn, M. *et al.* Obligate bacterial endosymbionts of *Acanthamoeba* spp. related to the  
31 beta-Proteobacteria: proposal of 'Candidatus Procabacter acanthamoebae' gen. nov., sp.  
32 nov. *Int J Syst Evol Microbiol* **52**, 599-605, doi:10.1099/00207713-52-2-599 (2002).
- 33 7 Margulis, L. in *Symbiosis in cell evolution: microbial communities in the Archean and*  
34 *Proterozoic eons* 1-18 (W.H. Freeman, 1993).
- 35 8 Handley, K. M. Determining Microbial Roles in Ecosystem Function: Redefining  
36 Microbial Food Webs and Transcending Kingdom Barriers. *mSystems* **4**,  
37 doi:10.1128/mSystems.00153-19 (2019).
- 38 9 Horn, M. & Wagner, M. Bacterial endosymbionts of free-living amoebae. *The Journal of*  
39 *eukaryotic microbiology* **51**, 509-514, doi:10.1111/j.1550-7408.2004.tb00278.x (2004).



- 1 10 Erken, M., Lutz, C. & McDougald, D. The rise of pathogens: predation as a factor driving  
2 the evolution of human pathogens in the environment. *Microb Ecol* **65**, 860-868,  
3 doi:10.1007/s00248-013-0189-0 (2013).
- 4 11 Amaro, F., Wang, W., Gilbert, J. A., Anderson, O. R. & Shuman, H. A. Diverse protist  
5 grazers select for virulence-related traits in *Legionella*. *ISME J* **9**, 1607-1618,  
6 doi:10.1038/ismej.2014.248 (2015).
- 7 12 Mishustin, E. N. Microbial associations of soil types. *Microb Ecol* **2**, 97-118,  
8 doi:10.1007/BF02010433 (1975).
- 9 13 Gong, J. *et al.* Protist-Bacteria Associations: Gammaproteobacteria and  
10 Alphaproteobacteria Are Prevalent as Digestion-Resistant Bacteria in Ciliated Protozoa.  
11 *Front Microbiol* **7**, 498, doi:10.3389/fmicb.2016.00498 (2016).
- 12 14 Anderson, O. R. The role of Bacterial-based Protist Communities in Aquatic and Soil  
13 Ecosystems and the Carbon Biogeochemical Cycle, with Emphasis on Naked Amoebae.  
14 *Acta Protozoologica* **51**, 209-221. (2012).
- 15 15 Schmitz-Esser, S. *et al.* The genome of the amoeba symbiont "Candidatus Amoebophilus  
16 asiaticus" reveals common mechanisms for host cell interaction among amoeba-  
17 associated bacteria. *Journal of bacteriology* **192**, 1045-1057, doi:10.1128/JB.01379-09  
18 (2010).
- 19 16 Best, A. M. & Abu Kwaik, Y. Evasion of phagotrophic predation by protist hosts and  
20 innate immunity of metazoan hosts by *Legionella pneumophila*. *Cell Microbiol* **21**,  
21 e12971, doi:10.1111/cmi.12971 (2019).
- 22 17 Greub, G. & Raoult, D. Microorganisms resistant to free-living amoebae. *Clin Microbiol*  
23 *Rev* **17**, 413-433, doi:10.1128/cmr.17.2.413-433.2004 (2004).
- 24 18 Foster, R. A., Carpenter, E. J. & Bergman, B. Unicellular cyanobionts in open ocean  
25 dinoflagellates, radiolarians, and tintinnids: ultrastructural characterization and immuno-  
26 localization of phycoerythrin and nitrogenase. *Journal of Phycology* **42**, 453-463 (2006).
- 27 19 Clarke, M. Recent insights into host-pathogen interactions from *Dictyostelium*. *Cell*  
28 *Microbiol* **12**, 283-291, doi:10.1111/j.1462-5822.2009.01413.x (2010).
- 29 20 Thewes, S., Soldati, T. & Eichinger, L. Editorial: Amoebae as Host Models to Study the  
30 Interaction With Pathogens. *Front Cell Infect Microbiol* **9**, 47,  
31 doi:10.3389/fcimb.2019.00047 (2019).
- 32 21 Strassmann, J. E. & Shu, L. Ancient bacteria-amoeba relationships and pathogenic animal  
33 bacteria. *PLoS Biol* **15**, e2002460, doi:10.1371/journal.pbio.2002460 (2017).
- 34 22 Benavides-Montano, J. A. & Vadyvaloo, V. *Yersinia pestis* Resists Predation by  
35 *Acanthamoeba castellanii* and Exhibits Prolonged Intracellular Survival. *Appl Environ*  
36 *Microbiol* **83**, doi:10.1128/AEM.00593-17 (2017).
- 37 23 Garcia, M. T., Jones, S., Pelaz, C., Millar, R. D. & Abu Kwaik, Y. *Acanthamoeba*  
38 polyphaga resuscitates viable non-culturable *Legionella pneumophila* after disinfection.  
39 *Environ Microbiol* **9**, 1267-1277, doi:10.1111/j.1462-2920.2007.01245.x (2007).
- 40 24 Alibaud, L. *et al.* *Pseudomonas aeruginosa* virulence genes identified in a *Dictyostelium*  
41 host model. *Cell Microbiol* **10**, 729-740, doi:10.1111/j.1462-5822.2007.01080.x (2008).
- 42 25 Dallaire-Dufresne, S., Paquet, V. E. & Charette, S. J. [*Dictyostelium discoideum*: a  
43 model for the study of bacterial virulence]. *Can J Microbiol* **57**, 699-707,  
44 doi:10.1139/w11-072 (2011).

- 1 26 Bozzaro, S. & Eichinger, L. The professional phagocyte *Dictyostelium discoideum* as a  
2 model host for bacterial pathogens. *Curr Drug Targets* **12**, 942-954,  
3 doi:10.2174/138945011795677782 (2011).
- 4 27 Cirillo, J. D. *et al.* Intracellular growth in *Acanthamoeba castellanii* affects monocyte  
5 entry mechanisms and enhances virulence of *Legionella pneumophila*. *Infect Immun* **67**,  
6 4427-4434 (1999).
- 7 28 Horn, M. *et al.* *Neochlamydia hartmannellae* gen. nov., sp. nov. (Parachlamydiaceae), an  
8 endoparasite of the amoeba *Hartmannella vermiformis*. *Microbiology* **146** ( Pt 5), 1231-  
9 1239, doi:10.1099/00221287-146-5-1231 (2000).
- 10 29 Gomez-Alvarez, V., Revetta, R. P. & Santo Domingo, J. W. Metagenomic analyses of  
11 drinking water receiving different disinfection treatments. *Appl Environ Microbiol* **78**,  
12 6095-6102, doi:10.1128/AEM.01018-12 (2012).
- 13 30 Fields, B. S. *et al.* Characterization of an axenic strain of *Hartmannella vermiformis*  
14 obtained from an investigation of nosocomial legionellosis. *J Protozool* **37**, 581-583,  
15 doi:10.1111/j.1550-7408.1990.tb01269.x (1990).
- 16 31 Segal, G. & Shuman, H. A. *Legionella pneumophila* utilizes the same genes to multiply  
17 within *Acanthamoeba castellanii* and human macrophages. *Infect Immun* **67**, 2117-2124  
18 (1999).
- 19 32 Kang, S. *et al.* Between a Pod and a Hard Test: The Deep Evolution of Amoebae.  
20 *Molecular biology and evolution* **34**, 2258-2270, doi:10.1093/molbev/msx162 (2017).
- 21 33 Tekle, Y. I. *et al.* Phylogenomics of 'Discosea': A new molecular phylogenetic  
22 perspective on Amoebozoa with flat body forms. *Molecular phylogenetics and evolution*  
23 **99**, 144-154, doi:10.1016/j.ympev.2016.03.029 (2016).
- 24 34 Tekle, Y. I. & Williams, J. R. Cytoskeletal architecture and its evolutionary significance  
25 in amoeboid eukaryotes and their mode of locomotion. *R Soc Open Sci* **3**, 160283,  
26 doi:10.1098/rsos.160283 (2016).
- 27 35 Tekle, Y. I. & Wood, F. C. *Longamoebia* is not monophyletic: Phylogenomic and  
28 cytoskeleton analyses provide novel and well-resolved relationships of amoebozoan  
29 subclades. *Molecular phylogenetics and evolution* **114**, 249-260,  
30 doi:10.1016/j.ympev.2017.06.019 (2017).
- 31 36 Deeg, C. M. *et al.* *Chromulinavorax destructans*, a pathogen of microzooplankton that  
32 provides a window into the enigmatic candidate phylum Dependenteae. *PLoS pathogens*  
33 **15**, e1007801, doi:10.1371/journal.ppat.1007801 (2019).
- 34 37 Delafont, V., Brouke, A., Bouchon, D., Moulin, L. & Hechard, Y. Microbiome of free-  
35 living amoebae isolated from drinking water. *Water Res* **47**, 6958-6965,  
36 doi:10.1016/j.watres.2013.07.047 (2013).
- 37 38 Tekle, Y. I., Anderson, O. R., Lecky, A. F. & Kelly, S. D. A New Freshwater Amoeba:  
38 *Cochliopodium pentatrifurcatum* n. sp. (Amoebozoa, Amorphea). *The Journal of*  
39 *eukaryotic microbiology* **60**, 342-349, doi:10.1111/jeu.12038 (2013).
- 40 39 Tekle, Y. I. & Wood, F. C. A practical implementation of large transcriptomic data  
41 analysis to resolve cryptic species diversity problems in microbial eukaryotes. *BMC*  
42 *evolutionary biology* **18**, 170, doi:10.1186/s12862-018-1283-1 (2018).
- 43 40 Weisenfeld, N. I., Kumar, V., Shah, P., Church, D. M. & Jaffe, D. B. Direct  
44 determination of diploid genome sequences. *Genome research* **27**, 757-767,  
45 doi:10.1101/gr.214874.116 (2017).



- 1 41 Vaser, R., Sovic, I., Nagarajan, N. & Sikic, M. Fast and accurate de novo genome  
2 assembly from long uncorrected reads. *Genome research* **27**, 737-746,  
3 doi:10.1101/gr.214270.116 (2017).
- 4 42 Li, H. Minimap2: pairwise alignment for nucleotide sequences. *Bioinformatics* **34**, 3094-  
5 3100, doi:10.1093/bioinformatics/bty191 (2018).
- 6 43 Li, H. Minimap and minimiasm: fast mapping and de novo assembly for noisy long  
7 sequences. *Bioinformatics* **32**, 2103-2110, doi:10.1093/bioinformatics/btw152 (2016).
- 8 44 Tekle, Y. I., Wang, F., Heidari, A. & Stewart, A. J. Differential Gene Expression  
9 Analysis and Cytological Evidence Reveal a Sexual Stage of an Amoeba with  
10 Multiparental Cellular and Nuclear Fusion. *bioRxiv*, doi: doi:  
11 <https://doi.org/10.1101/2020.06.23.166678> (2020).
- 12 45 Wood, D. E., Lu, J. & Langmead, B. Improved metagenomic analysis with Kraken 2.  
13 *Genome biology* **20**, 257, doi:10.1186/s13059-019-1891-0 (2019).
- 14 46 Amann, R. *et al.* Obligate intracellular bacterial parasites of acanthamoebae related to  
15 Chlamydia spp. *Appl Environ Microbiol* **63**, 115-121 (1997).
- 16 47 DiSalvo, S. *et al.* Burkholderia bacteria infectiousy induce the proto-farming symbiosis  
17 of Dictyostelium amoebae and food bacteria. *Proc Natl Acad Sci U S A* **112**, E5029-5037,  
18 doi:10.1073/pnas.1511878112 (2015).
- 19 48 Brock, D. A., Read, S., Bozhchenko, A., Queller, D. C. & Strassmann, J. E. Social  
20 amoeba farmers carry defensive symbionts to protect and privatize their crops. *Nat*  
21 *Commun* **4**, 2385, doi:10.1038/ncomms3385 (2013).
- 22 49 Brock, D. A., Douglas, T. E., Queller, D. C. & Strassmann, J. E. Primitive agriculture in a  
23 social amoeba. *Nature* **469**, 393-396, doi:10.1038/nature09668 (2011).
- 24 50 Nakazato, H., Venkatesan, S. & Edmonds, M. Polyadenylic acid sequences in E. coli  
25 messenger RNA. *Nature* **256**, 144-146, doi:10.1038/256144a0 (1975).
- 26 51 Ohta, N., Sanders, M. & Newton, A. Poly(adenylic acid) sequences in the RNA of  
27 Caulobacter crescenus. *Proc Natl Acad Sci U S A* **72**, 2343-2346,  
28 doi:10.1073/pnas.72.6.2343 (1975).
- 29 52 Strong, M. J. *et al.* Microbial contamination in next generation sequencing: implications  
30 for sequence-based analysis of clinical samples. *PLoS pathogens* **10**, e1004437,  
31 doi:10.1371/journal.ppat.1004437 (2014).
- 32 53 Zou, S., Zhang, Q. & Gong, J. Comparative Transcriptomics Reveals Distinct Gene  
33 Expressions of a Model Ciliated Protozoa Feeding on Bacteria-Free Medium, Digestible,  
34 and Digestion-Resistant Bacteria. *Microorganisms* **8**,  
35 doi:10.3390/microorganisms8040559 (2020).
- 36 54 Fritsche, T. R., Gautom, R. K., Seyedirashti, S., Bergeron, D. L. & Lindquist, T. D.  
37 Occurrence of bacterial endosymbionts in Acanthamoeba spp. isolated from corneal and  
38 environmental specimens and contact lenses. *J Clin Microbiol* **31**, 1122-1126 (1993).
- 39 55 Proca-Ciobanu, M., Lupascu, G. H., Petrovici, A. & Ionescu, M. D. Electron microscopic  
40 study of a pathogenic Acanthamoeba castellani strain: the presence of bacterial  
41 endosymbionts. *Int J Parasitol* **5**, 49-56, doi:10.1016/0020-7519(75)90097-1 (1975).
- 42 56 Singh, B. N. Selectivity in bacterial food by soil amoebae in pure mixed cultures and in  
43 sterilized soil. *Ann. Appl. Biol.* **28**, 52-64. (1941).
- 44 57 Singh, B. N. The selection of bacterial food by soil amoebae, and the toxic effects of  
45 bacterial pigments and other products on soil protozoa. *Brit. J. Exp. Path.* **26**, 316-325.  
46 (1945 ).

- 1 58 Ronn, R., McCaig, A. E., Griffiths, B. S. & Prosser, J. I. Impact of protozoan grazing on  
2 bacterial community structure in soil microcosms. *Appl Environ Microbiol* **68**, 6094-  
3 6105, doi:10.1128/aem.68.12.6094-6105.2002 (2002).
- 4 59 Skriwan, C. *et al.* Various bacterial pathogens and symbionts infect the amoeba  
5 Dictyostelium discoideum. *Int J Med Microbiol* **291**, 615-624, doi:10.1078/1438-4221-  
6 00177 (2002).
- 7 60 Molmeret, M., Bitar, D. M., Han, L. & Kwaik, Y. A. Disruption of the phagosomal  
8 membrane and egress of Legionella pneumophila into the cytoplasm during the last  
9 stages of intracellular infection of macrophages and Acanthamoeba polyphaga. *Infect*  
10 *Immun* **72**, 4040-4051, doi:10.1128/IAI.72.7.4040-4051.2004 (2004).
- 11 61 Fritsche, T. R. *et al.* Phylogenetic diversity among geographically dispersed  
12 Chlamydiales endosymbionts recovered from clinical and environmental isolates of  
13 Acanthamoeba spp. *Appl Environ Microbiol* **66**, 2613-2619, doi:10.1128/aem.66.6.2613-  
14 2619.2000 (2000).

15  
16

### 17 **Figure captions**

18

19 **Figure 1.** A distribution of genera representing 57 Bacterial phyla discovered in the three major  
20 clades of Amoebozoa across all datasets analyzed.

21

22 **Figure 2.** Venn diagram showing bacterial phyla shared among the three major clades of  
23 Amoebozoa of the whole culture RNA-Seq data (A) and among the four types of datasets  
24 analyzed (B).

25

26 **Figure 3.** Distribution of the 44 pathogenic bacterial genera discovered in the three major clades  
27 of Amoebozoa in the whole culture RNA-Seq data.

28

1 **Table 1.** List of potential endosymbiont (pathogens) bacterial phyla and their abundance (total  
 2 number of sequences) found in all or at least 3 datasets analyzed.  
 3

| Phylum                    | Present | Total | Pathogen                                                                                                                                                                                                                                                                                                                                            |
|---------------------------|---------|-------|-----------------------------------------------------------------------------------------------------------------------------------------------------------------------------------------------------------------------------------------------------------------------------------------------------------------------------------------------------|
| Proteobacteria            | 4/4     | 16501 | <b>Alpha</b> - <i>Ehrlichia, Rickettsia</i> ; <b>Beta</b> - <i>Bordetella, Burkholderia, Neisseria</i> ; <b>Epsilon</b> – <i>Campylobacter</i> ; <b>Gamma</b> – <i>Acinetobacter, Coxiella, Enterobacter, Escherichia, Francisella, Haemophilus, Klebsiella, Legionella, Proteus, Pseudomonas, Salmonella, Serratia, Shigella, Vibrio, Yersinia</i> |
| Bacteroidetes             | 4/4     | 2028  | <i>Chryseobacterium, Porphyromonas, Prevotella</i>                                                                                                                                                                                                                                                                                                  |
| Firmicutes                | 4/4     | 1773  | <i>Bacillus, Clostridium, Enterococcus, Faecalibacterium, Staphylococcus, Streptococcus</i>                                                                                                                                                                                                                                                         |
| Patescibacteria           | 4/4     | 452   | -                                                                                                                                                                                                                                                                                                                                                   |
| Actinobacteria            | 4/4     | 404   | <i>Actinomyces, Corynebacterium, Mycobacterium, Nocardia, Propionibacterium, Rhodococcus, Rothia, Trueperella</i>                                                                                                                                                                                                                                   |
| Cyanobacteria             | 4/4     | 378   | -                                                                                                                                                                                                                                                                                                                                                   |
| Chloroflexi               | 4/4     | 347   | -                                                                                                                                                                                                                                                                                                                                                   |
| Tenericutes               | 4/4     | 267   | <i>Mycoplasma, Ureaplasma</i>                                                                                                                                                                                                                                                                                                                       |
| Planctomycetes            | 4/4     | 233   | -                                                                                                                                                                                                                                                                                                                                                   |
| Verrucomicrobia           | 4/4     | 189   | -                                                                                                                                                                                                                                                                                                                                                   |
| Acidobacteria             | 4/4     | 140   | -                                                                                                                                                                                                                                                                                                                                                   |
| Epsilonbacteraeota        | 4/4     | 104   | -                                                                                                                                                                                                                                                                                                                                                   |
| Nitrospirae               | 4/4     | 33    | -                                                                                                                                                                                                                                                                                                                                                   |
| Gemmatimonadetes          | 4/4     | 32    | -                                                                                                                                                                                                                                                                                                                                                   |
| Elusimicrobia             | 3/4     | 171   | -                                                                                                                                                                                                                                                                                                                                                   |
| Spirochaetes              | 3/4     | 53    | <i>Brachyspira, Borrelia, Leptospira, Treponema</i>                                                                                                                                                                                                                                                                                                 |
| Dependentiae              | 3/4     | 36    | -                                                                                                                                                                                                                                                                                                                                                   |
| Armatimonadetes           | 3/4     | 19    | -                                                                                                                                                                                                                                                                                                                                                   |
| Fibrobacteres             | 3/4     | 18    | -                                                                                                                                                                                                                                                                                                                                                   |
| Omnitrophicaeota          | 3/4     | 14    | -                                                                                                                                                                                                                                                                                                                                                   |
| Marinimicrobia/SA<br>R406 | 3/4     | 13    | -                                                                                                                                                                                                                                                                                                                                                   |
| BRC1                      | 3/4     | 13    | -                                                                                                                                                                                                                                                                                                                                                   |
| Synergistetes             | 3/4     | 9     | <i>Acetomicrobium, Cloacibacillus, Synergistes</i>                                                                                                                                                                                                                                                                                                  |
| Latescibacteria           | 3/4     | 9     | -                                                                                                                                                                                                                                                                                                                                                   |

4 Two pathogens containing phyla, Chlamydiae (*Neochlamydia*) and Fusobacteria (*Fusobacterium*), have been  
 5 detected in this study but were only found in one of our datasets.  
 6

1  
2  
3  
4  
5  
6  
7  
8  
9  
10  
11  
12  
13  
14  
15  
16  
17  
18  
19  
20  
21  
22

## Supplementary Materials Captions

**Figure S1.** Distribution of the pathogenic bacterial genera discovered in the four datasets analyzed.

**Table S1.** Tally of bacterial genera in whole culture RNA-Seq dataset. All amoebozoans representing the three major clades including species pairs sequenced in different labs (shown in red font) are included.

**Table S2.** Tally of bacterial genera derived from single cells RNA-Seq dataset. For this analysis different samples from *Cochliopodium minus* were examined.

**Table S3.** Tally of bacterial genera derived from whole culture and single cells genome datasets.

**Table S4.** Tally of potential human pathogenic bacterial genera using the whole culture RNA-Seq data in amoebozoans representing the three major clades.

**Table S5.** Tally of potential human pathogenic bacterial genera in three datasets including Single cells and whole culture genome datasets and single cell RNA-Seq data.

1 **Figure 1**  
2

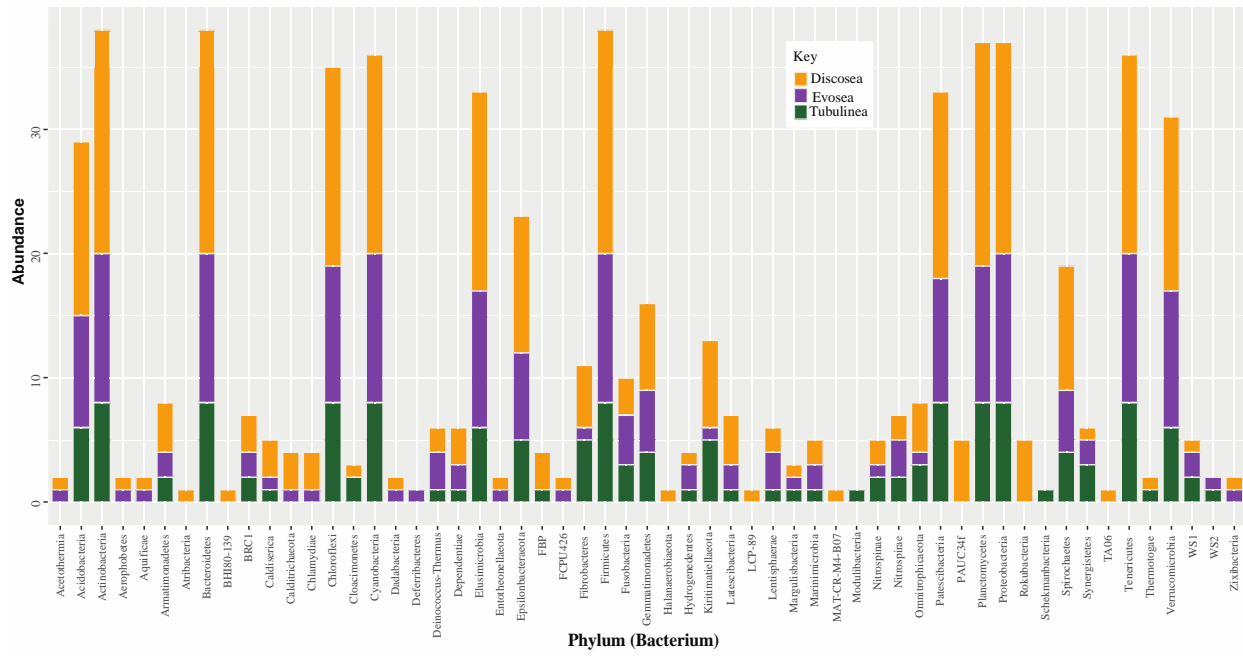

3

1 **Figure 2**

A.

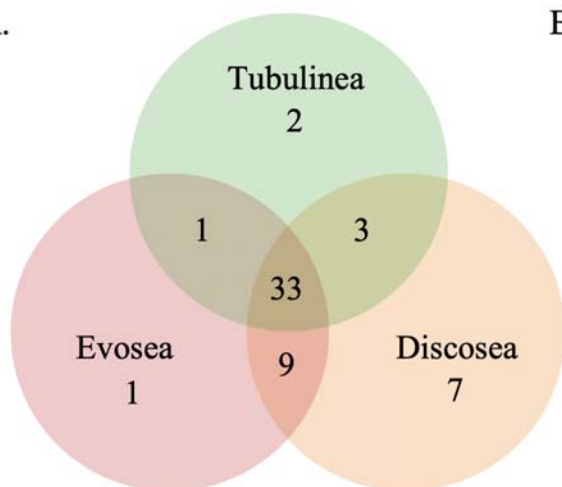

B.

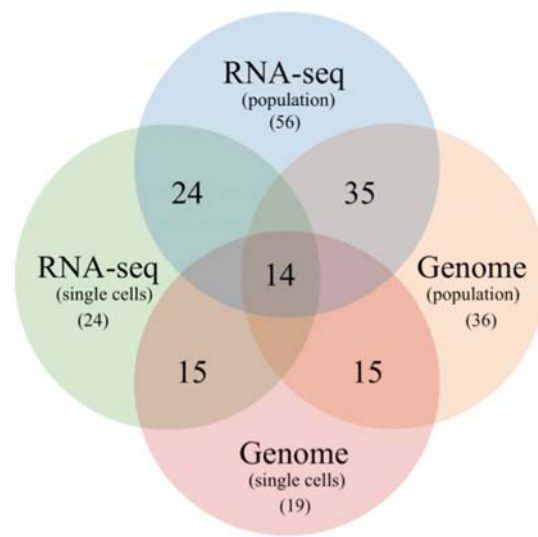

2

1 **Figure 3**

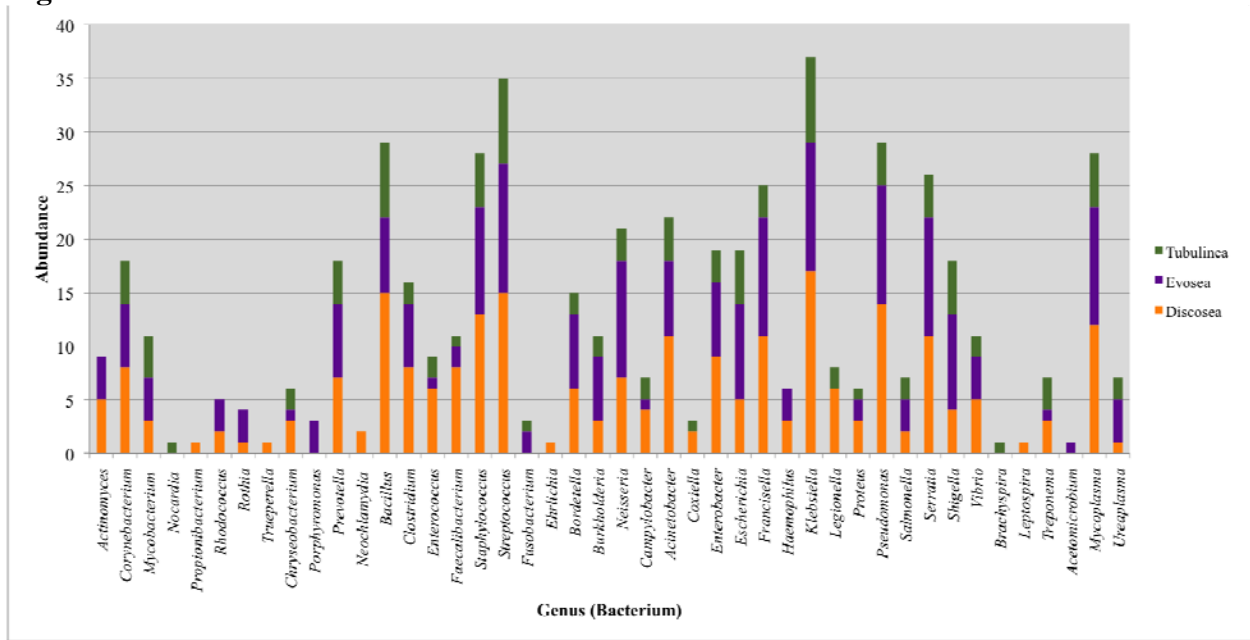

2
